# Supplementary material
Source: PubMed Central journal article supplement (PMC4266334)
Supplement: jm5012337_si_001.pdf [file jm5012337_si_001.pdf]

***In vitro* and *in vivo* Evaluation of Water-soluble Iminophosphorane Ruthenium(II)  
Compounds. A Potential Chemotherapeutic Agent for Triple Negative Breast Cancer**

*Malgorzata Frik,<sup>a</sup> Alberto Martínez,<sup>b</sup> Benelita T. Elie,<sup>a</sup> Oscar Gonzalo,<sup>c</sup> Daniel Ramírez de Mingo,<sup>c</sup> Mercedes Sanaú,<sup>d</sup> Roberto Sanchez-Delgado,<sup>a</sup> Tanmoy Sadhukha,<sup>e</sup> Swayam Prabha,<sup>e,f</sup> Joe W. Ramos,<sup>g</sup> Isabel Marzo,<sup>c\*</sup> and María Contel<sup>a,g\*</sup>*

**Supporting Information**

**Contents:**

|                                                                                                                                                              |    |
|--------------------------------------------------------------------------------------------------------------------------------------------------------------|----|
| 1. Crystallographic Data for Compound <b>1</b>                                                                                                               | 2  |
| 2. <sup>1</sup> H NMR and <sup>31</sup> P{ <sup>1</sup> H} NMR spectra of compounds <b>2-4, 7</b> and <b>8</b> in CDCl <sub>3</sub>                          | 3  |
| 3. Stability of compounds <b>1-4, 8</b> and <b>9</b> in d <sup>6</sup> -DMSO solution overtime assessed by <sup>31</sup> P{ <sup>1</sup> H} NMR spectroscopy | 7  |
| 4. <sup>31</sup> P{ <sup>1</sup> H} NMR spectra of compounds <b>1-4, 8,</b> and <b>9</b> in d <sup>6</sup> -DMSO overtime                                    | 8  |
| 5. <sup>31</sup> P{ <sup>1</sup> H}, <sup>1</sup> H NMR and <sup>13</sup> C NMR spectra of compounds <b>2, 3</b> and <b>4</b> in D <sub>2</sub> O overtime   | 11 |
| 6. <sup>31</sup> P{ <sup>1</sup> H} and <sup>1</sup> H NMR spectra of compound <b>2</b> in a 100 mM NaCl/D <sub>2</sub> O solution overtime                  | 15 |
| 7. <sup>31</sup> P{ <sup>1</sup> H} and <sup>1</sup> H NMR spectra of compounds <b>2</b> and <b>3</b> in a D <sub>2</sub> O solution at 80°C during 1 h      | 16 |
| 8. Mass spectra (ESI+) of compound <b>2</b> in H <sub>2</sub> O solution overtime (5 days)                                                                   | 17 |
| 9. Study of the effect of <b>2</b> in the levels of proteins of the Bcl-2 family                                                                             | 20 |
| 10. Experiments to assess the interaction of compounds <b>2-4</b> with CT DNA by circular dichroism                                                          | 21 |

## 1. Crystallographic Data for Compound 1

**Table S1.** Crystal Data and Structure Refinement for compound **1**

---

|                                          |                                                                                    |
|------------------------------------------|------------------------------------------------------------------------------------|
| formula                                  | C <sub>34</sub> H <sub>33</sub> ClF <sub>6</sub> N <sub>2</sub> OP <sub>2</sub> Ru |
| Fw                                       | 798.08                                                                             |
| T [K]                                    | 293 (2)                                                                            |
| $\lambda$ (MoK $\alpha$ )[Å]             | 0.71073                                                                            |
| crystal system                           | Monoclinic                                                                         |
| space group                              | C2/c                                                                               |
| $a$ [Å]                                  | 37.8820(15)                                                                        |
| $b$ [Å]                                  | 10.8170(5)                                                                         |
| $c$ [Å]                                  | 17.8540(4)                                                                         |
| $\alpha$ [°]                             | 90                                                                                 |
| $\beta$ [°]                              | 108.766(2)                                                                         |
| $\gamma$ [°]                             | 90                                                                                 |
| $V$ [Å] <sup>3</sup>                     | 6927.1(4)                                                                          |
| $Z$                                      | 8                                                                                  |
| $D_{\text{calcd}}$ (g cm <sup>-3</sup> ) | 1.531                                                                              |
| $\mu$ (mm <sup>-1</sup> )                | 0.685                                                                              |
| GOF                                      | 0.951                                                                              |
| $R_1[I > 2\sigma]$                       | 0.0551                                                                             |
| w $R_2$ (all data)                       | 0.1658                                                                             |

---

## 2. $^1\text{H}$ NMR spectra of compounds 2-4, 6-8

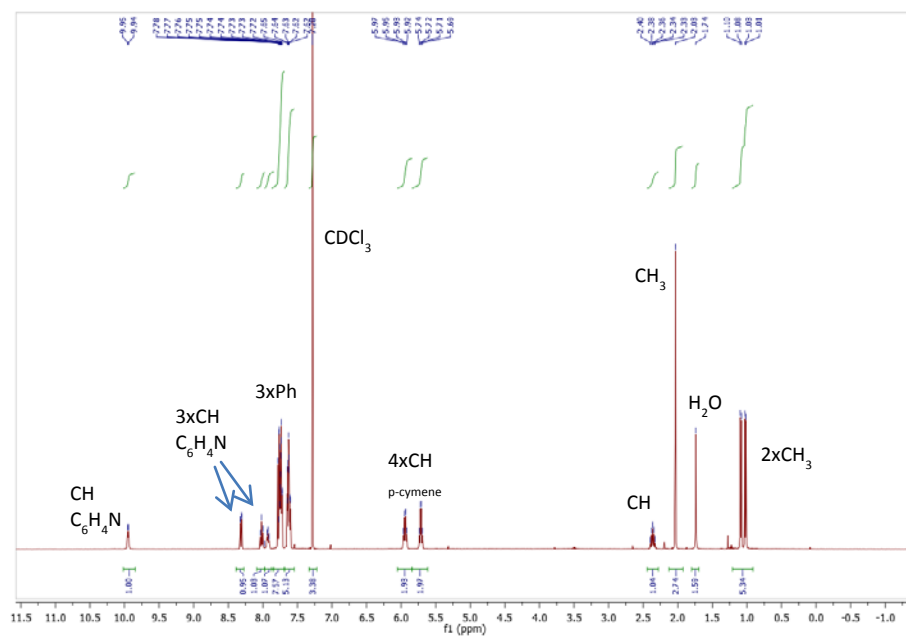

Figure S1.  $^1\text{H}$  NMR spectra of compound **2** in  $\text{CDCl}_3$ .

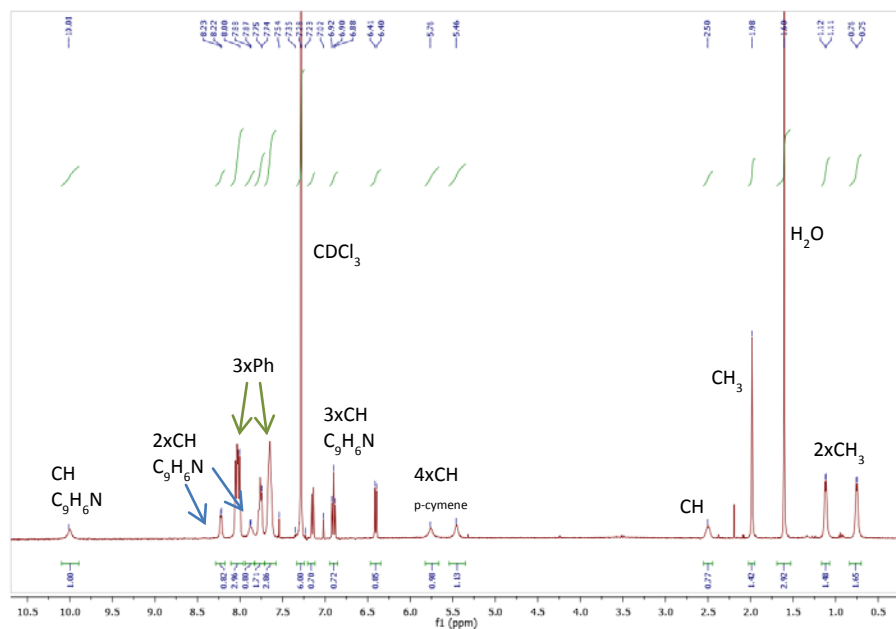

Figure S2.  $^1\text{H}$  NMR spectra of compound **3** in  $\text{CDCl}_3$ .

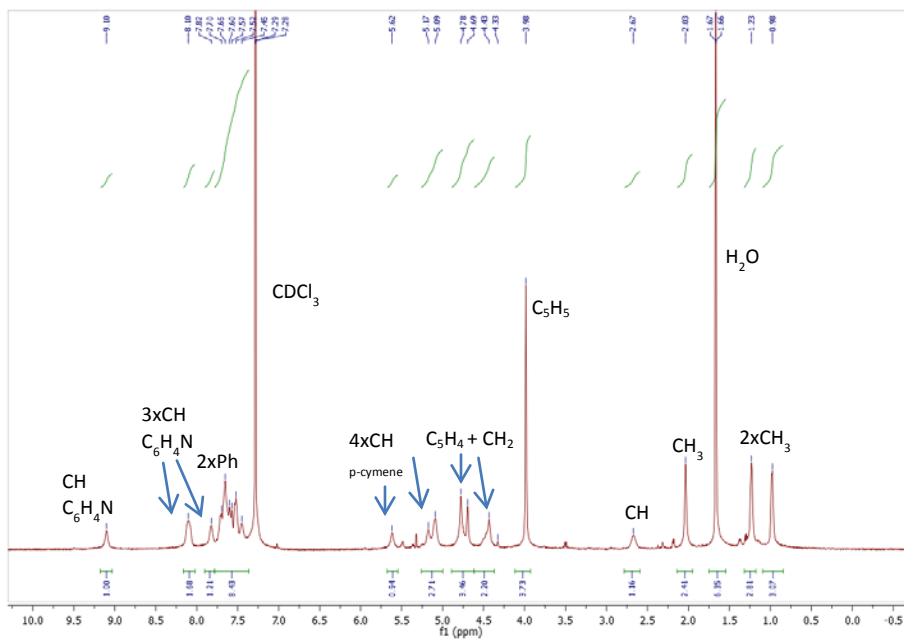

**Figure S3.**  $^1\text{H}$  NMR spectra of compound **4** in  $\text{CDCl}_3$ .

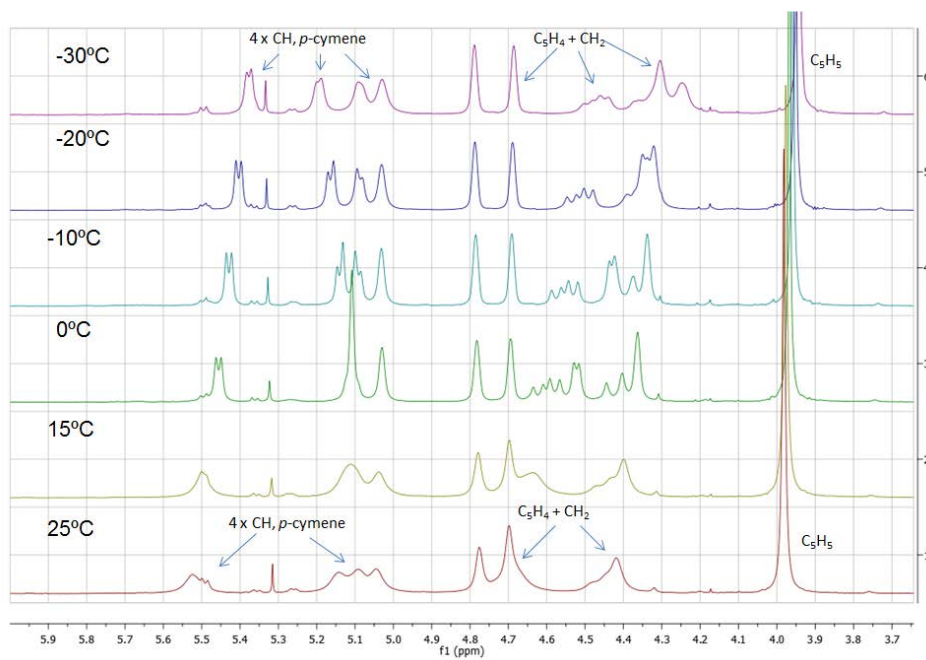

**Figure S4.** Variable temperature  $^1\text{H}$  NMR spectra of compound **4** in  $\text{CDCl}_3$  (magnification zone 6.1–3.6 ppm).

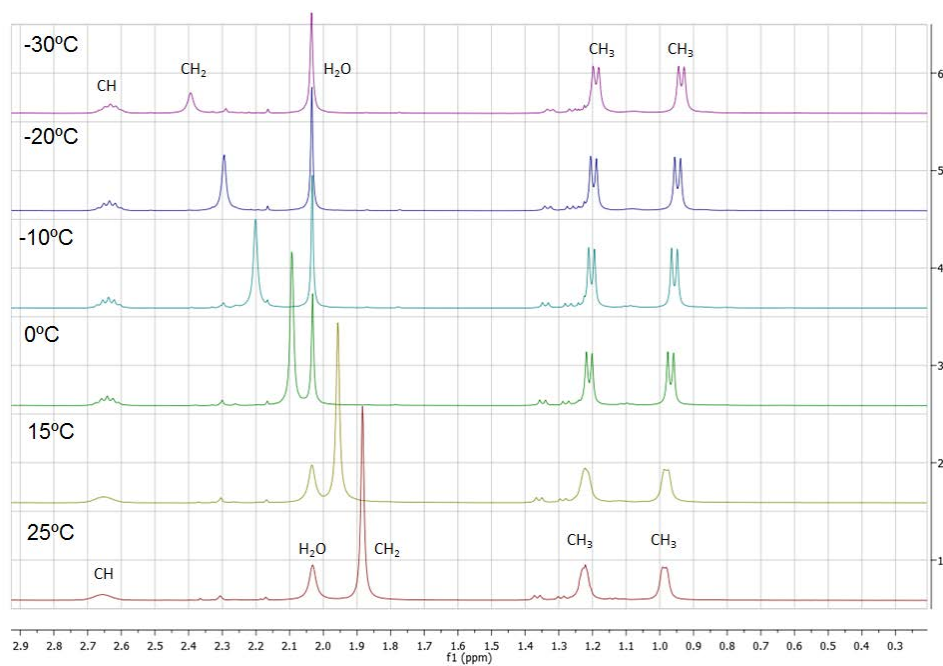

**Figure S5.** Variable temperature  $^1\text{H}$  spectra of compound **4** in  $\text{CDCl}_3$  (magnification zone 2.9-0.1 ppm).

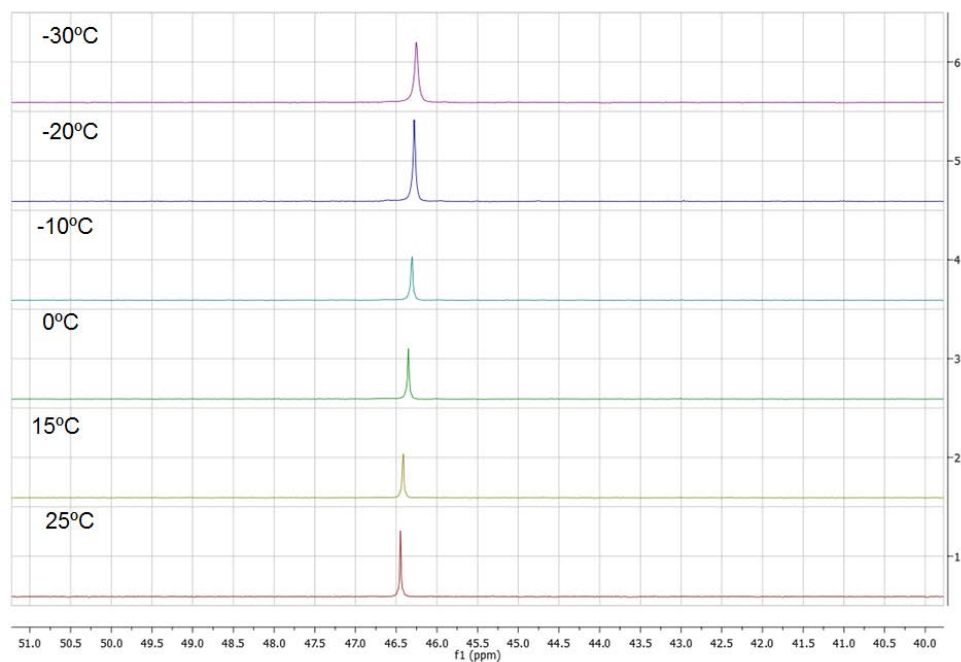

**Figure S6.** Variable temperature  $^{31}\text{P}\{^1\text{H}\}$  NMR spectra of compound **4** in  $\text{CDCl}_3$  ( $\delta$  46.45 (s) ppm).

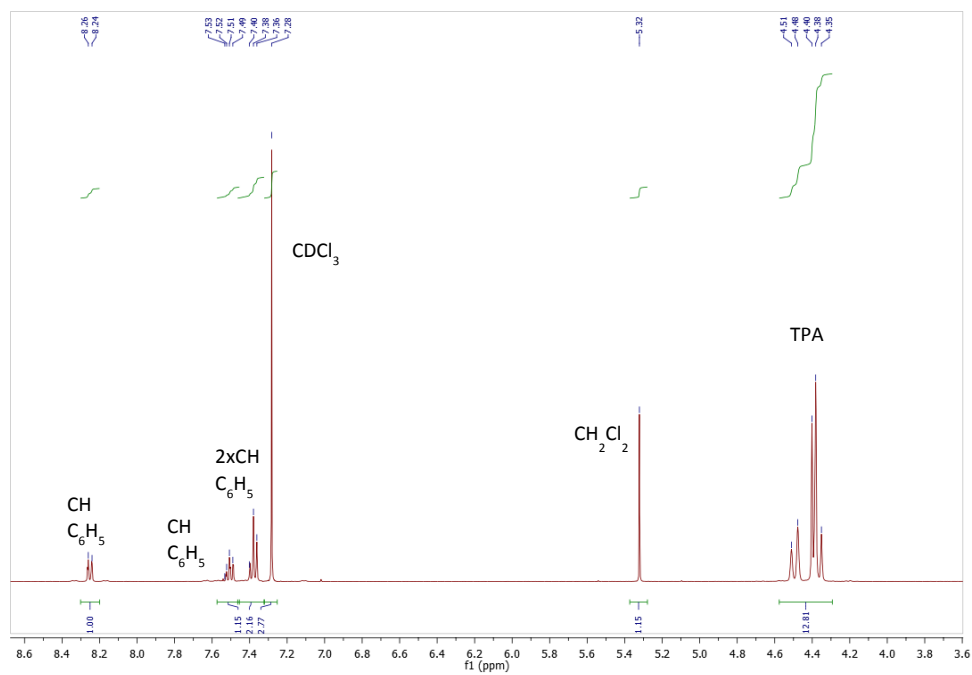

Figure S7.  $^1\text{H}$  NMR spectra of compound **7** in  $\text{CDCl}_3$ .

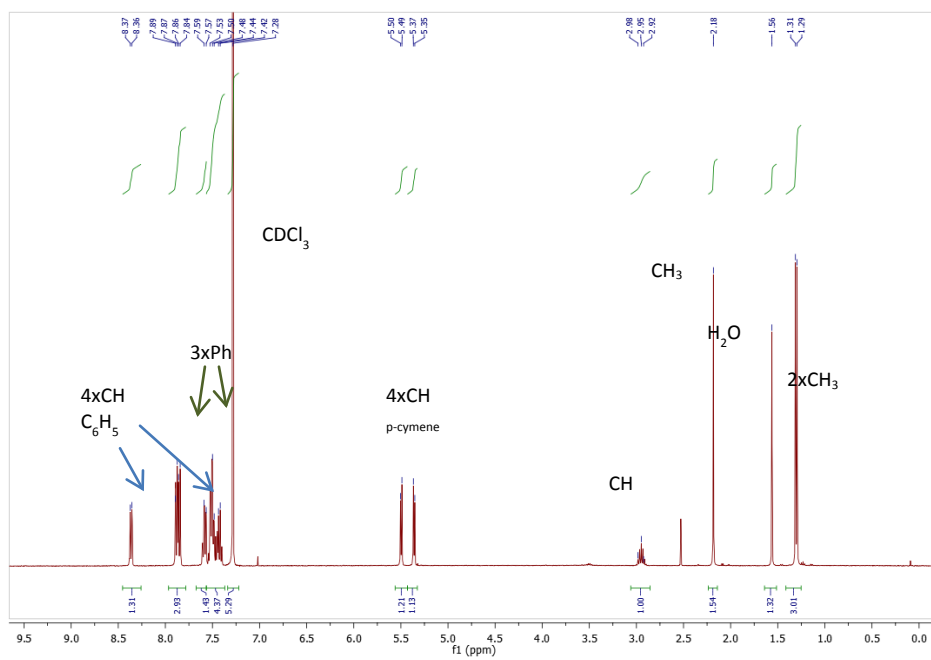

Figure S8.  $^1\text{H}$  NMR spectra of compound **8** in  $\text{CDCl}_3$ .

3. Stability of compounds 1-4, 8 and 9 in d<sup>6</sup>-DMSO and D<sub>2</sub>O solution overtime assessed by <sup>31</sup>P{<sup>1</sup>H} NMR spectroscopy<sup>a</sup>

|          | d <sup>6</sup> -DMSO |       |        |        |         |         |         |            |                 |
|----------|----------------------|-------|--------|--------|---------|---------|---------|------------|-----------------|
|          | 2.5 hr               | 1 day | 6 days | 1 week | 2 weeks | 3 weeks | 1 month | 1.5 months | Half life (50%) |
| <b>1</b> |                      |       |        |        | >99%    |         | 91%     |            | <b>months</b>   |
| <b>2</b> |                      |       |        |        |         | >99%    | 87%     |            | <b>months</b>   |
| <b>3</b> |                      |       |        |        |         |         |         | >99%       | <b>months</b>   |
| <b>4</b> |                      |       |        |        |         |         | >99%    |            | <b>months</b>   |
| <b>8</b> |                      |       | >99%   | 58%    |         | 25%     | 0%      |            | <b>~9 days</b>  |
| <b>9</b> | >99%                 | 85%   |        | 50%    | 27%     |         | 6%      |            | <b>~1 week</b>  |

a) % of decomposition determined by integration of all the signals present in the <sup>31</sup>P{<sup>1</sup>H} NMR spectra, the sum being set to 100%.

|          | D <sub>2</sub> O |                  |
|----------|------------------|------------------|
|          | 3 days           | Half lives (50%) |
| <b>1</b> |                  | <b>insoluble</b> |
| <b>2</b> |                  | <b>2.5 days</b>  |
| <b>3</b> |                  | <b>b</b>         |
| <b>4</b> | >99%             | <b>c</b>         |

a) % of decomposition determined by integration of all the signals present in the <sup>31</sup>P{<sup>1</sup>H} NMR spectra, the sum being set to 100%.

b) Compound hydrolyzes when dissolved in water (45:55 ratio).

c) Compound precipitates after 3 days.

4.  $^{31}\text{P}\{^1\text{H}\}$  NMR spectra showing the stability of compounds 1-4, 8, 9 in  $\text{d}^6$ -DMSO overtime

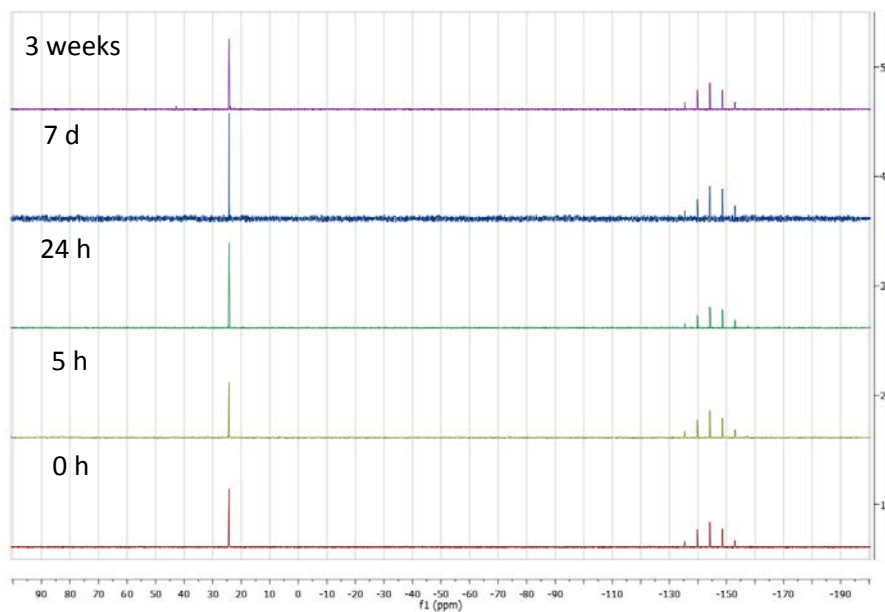

**Figure S9.**  $^{31}\text{P}\{^1\text{H}\}$  NMR spectra of compound 1 in  $\text{d}^6$ -DMSO ( $\delta$  24.27 (s) and  $-144.20$  (h) ppm) overtime.

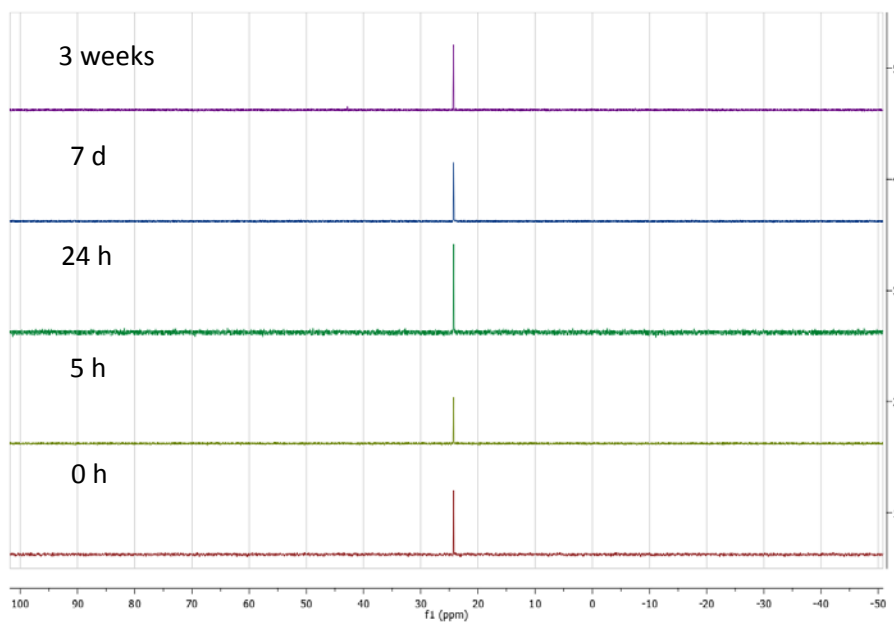

**Figure. S10.**  $^{31}\text{P}\{^1\text{H}\}$  NMR spectra of compound 2 in  $\text{d}^6$ -DMSO ( $\delta$  24.26 (s) ppm) overtime.



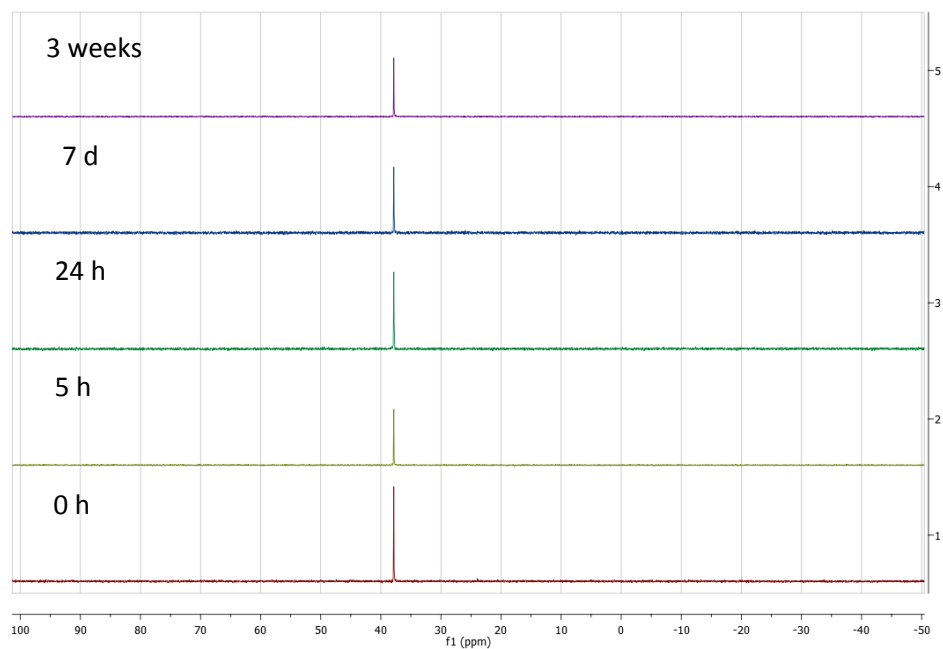

**Figure S11.**  $^{31}\text{P}\{^1\text{H}\}$  NMR spectra of compound **3** in  $\text{d}^6\text{-DMSO}$  ( $\delta$  37.84 (s) ppm) overtime.

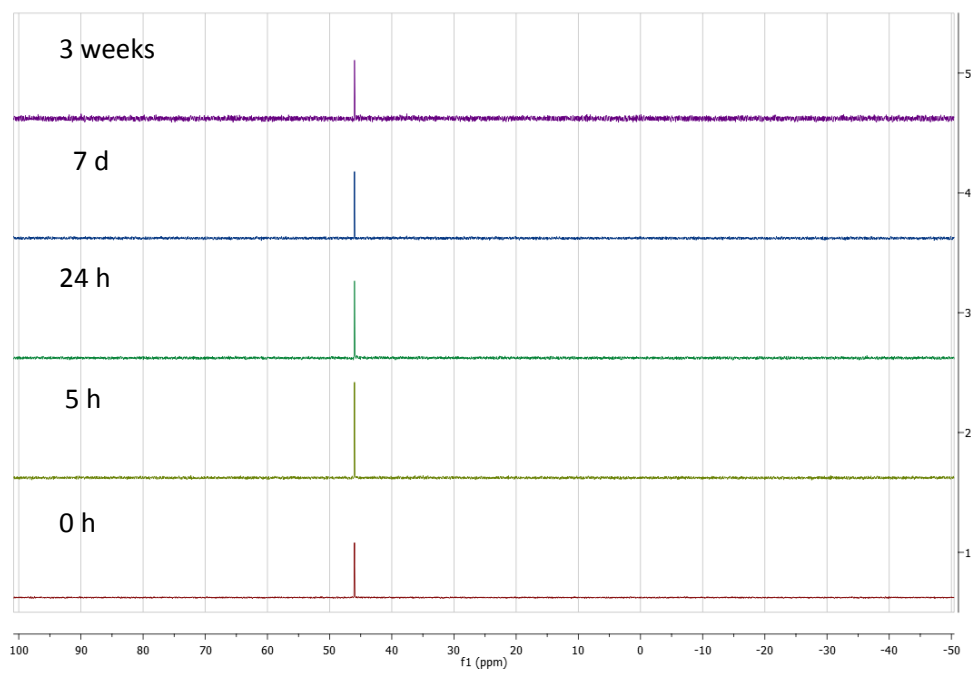

**Figure S12.**  $^{31}\text{P}\{^1\text{H}\}$  NMR spectra of compound **4** in  $\text{d}^6\text{-DMSO}$  ( $\delta$  45.99 (s) ppm) overtime.

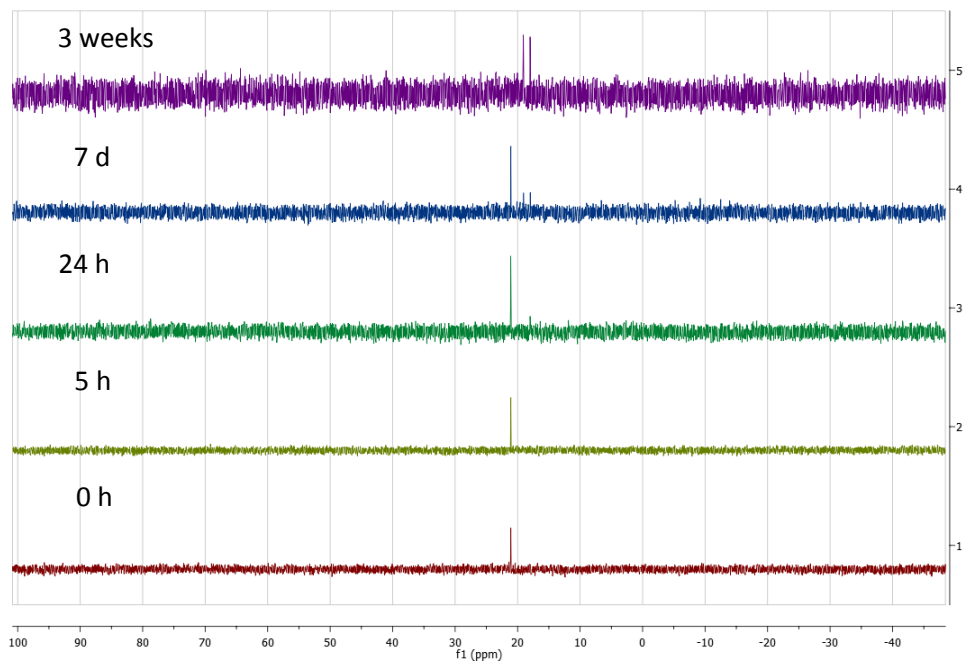

**Figure S13.**  $^{31}\text{P}\{^1\text{H}\}$  NMR spectra of compound **8** in  $\text{d}^6$ -DMSO ( $\delta$  21.09 (s) ppm) overtime.

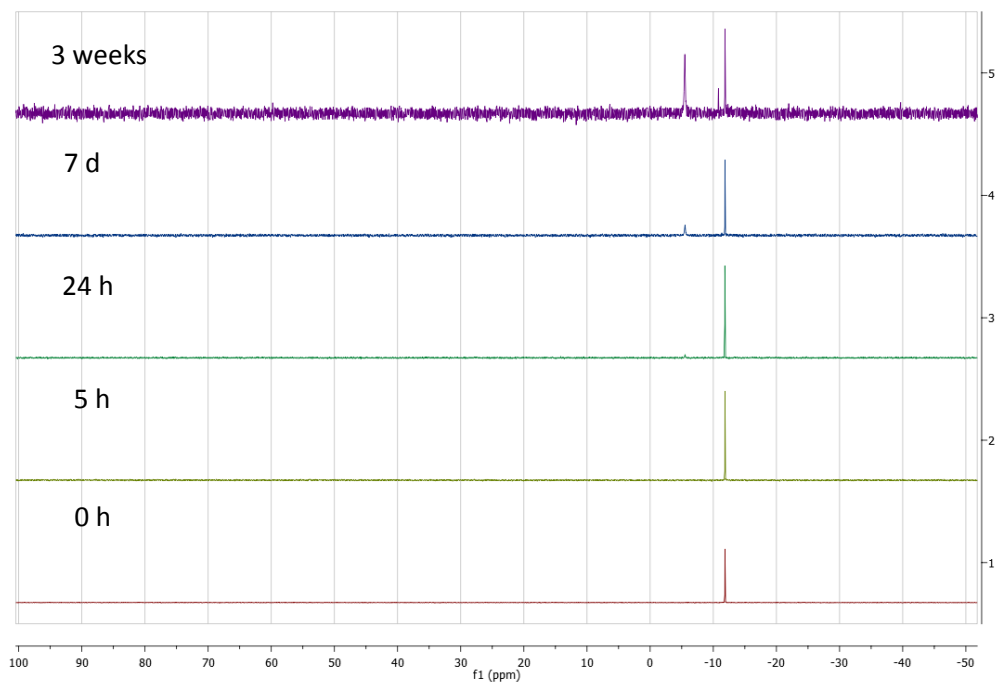

**Figure S14.**  $^{31}\text{P}\{^1\text{H}\}$  NMR spectra of compound **9** in  $\text{d}^6$ -DMSO ( $\delta$  -11.85 (s) ppm) overtime.

5.  $^{31}\text{P}\{^1\text{H}\}$ ,  $^1\text{H}$  NMR and  $^{13}\text{C}$  NMR spectra of compounds **2**, **3** and **4** in  $\text{D}_2\text{O}$  overtime

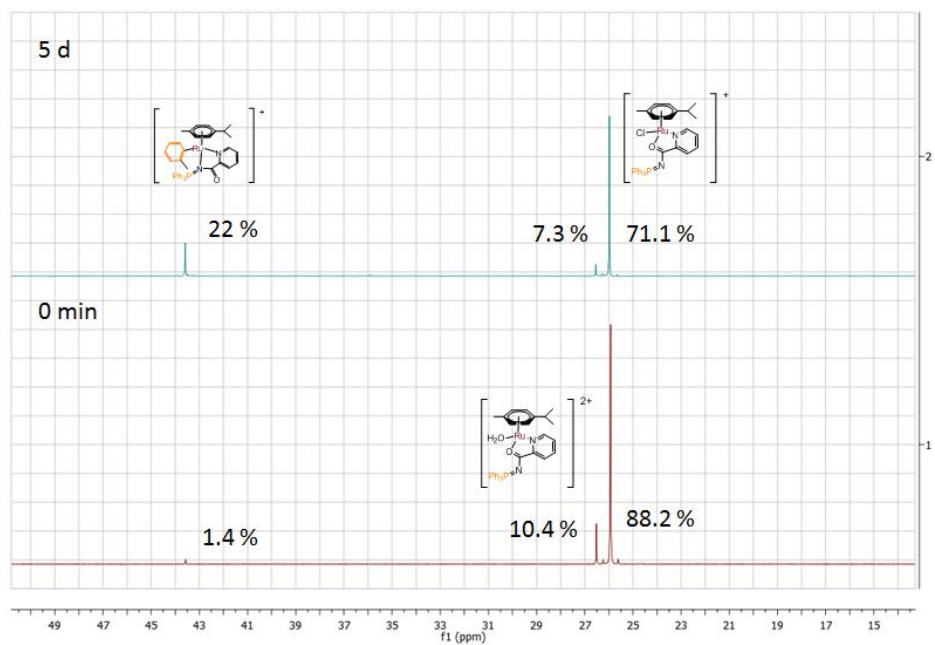

Figure S15.  $^{31}\text{P}\{^1\text{H}\}$  NMR spectra of compound **2** in  $\text{D}_2\text{O}$  ( $\delta$  26.37 (s) ppm) overtime.

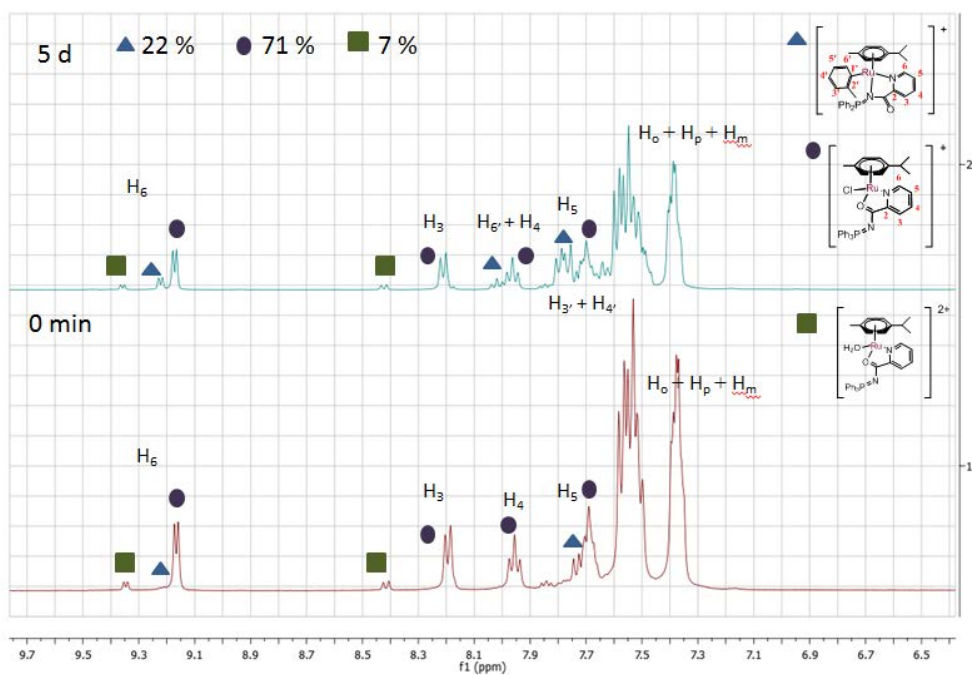

Figure S16.  $^1\text{H}$  NMR spectra of compound **2** in  $\text{D}_2\text{O}$  at  $t = 0$  and after 5 days.

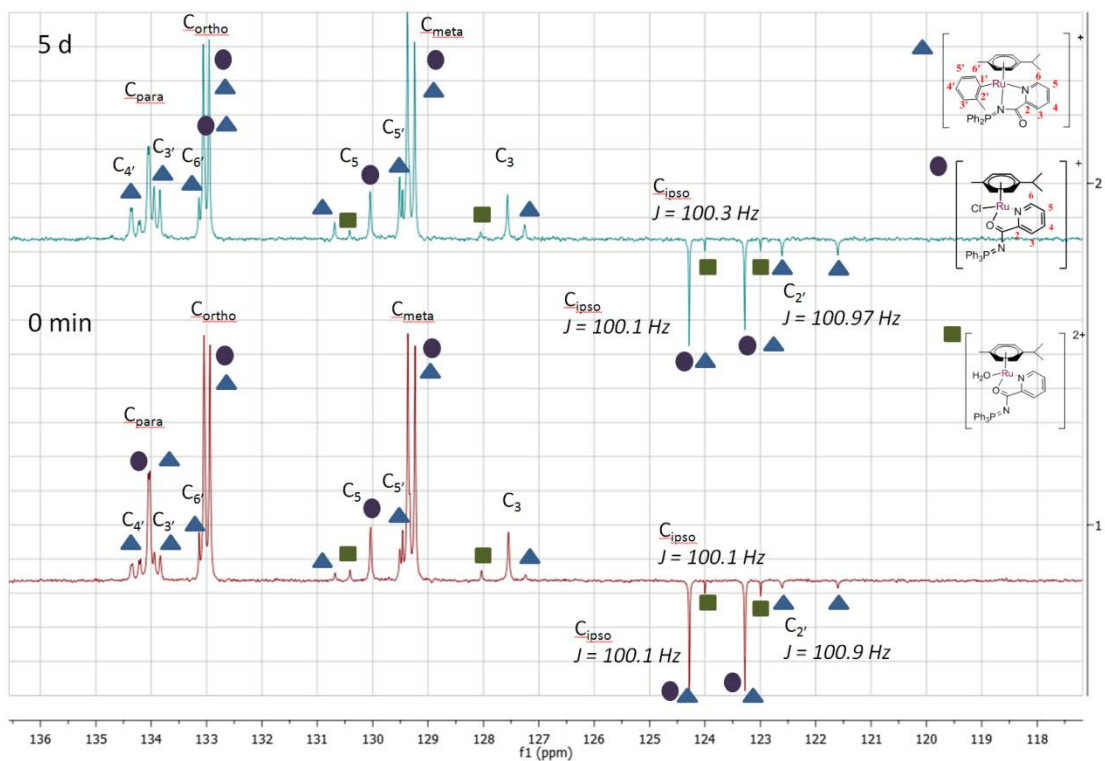

Figure S17.  $^{13}\text{C}$  NMR spectra of compound **2** in  $\text{D}_2\text{O}$  at  $t = 0$  and after 5 days.

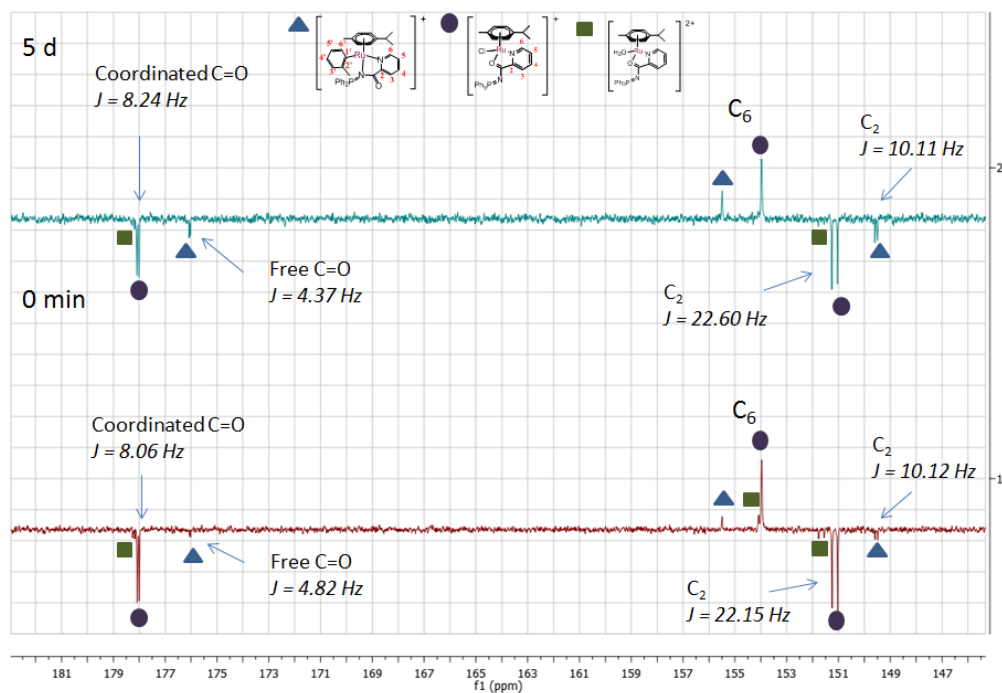

Figure S18.  $^{13}\text{C}$  NMR spectra of compound **2** in  $\text{D}_2\text{O}$  at  $t = 0$  and after 5 days.

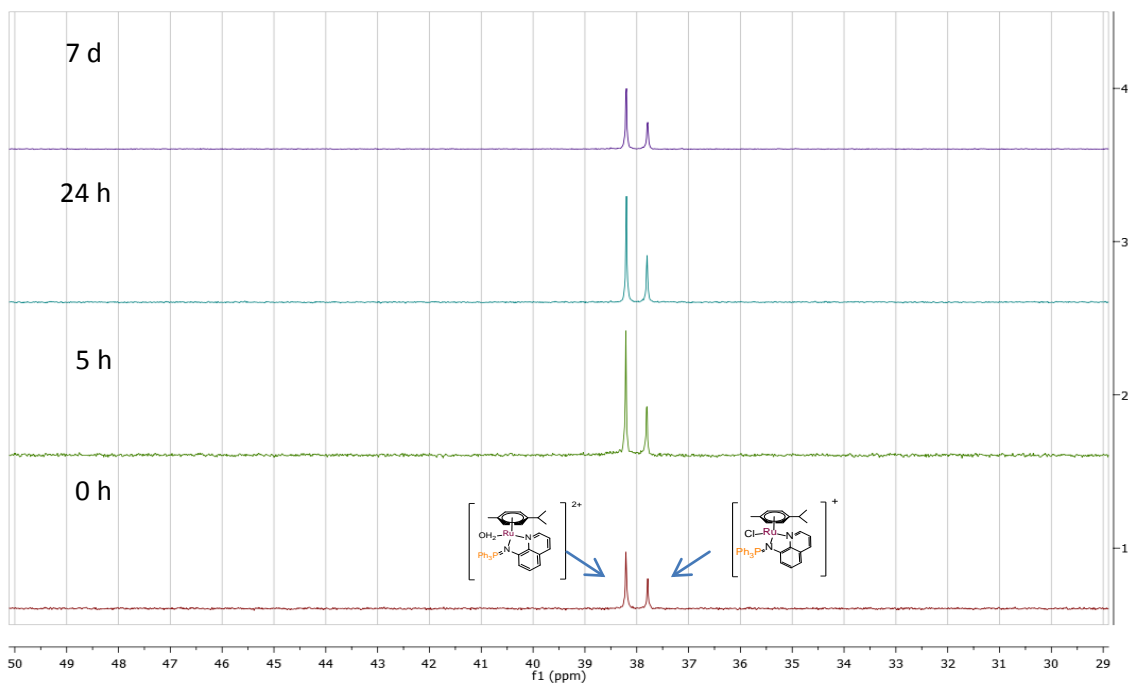

**Figure S19.**  $^{31}\text{P}\{^1\text{H}\}$  NMR spectra of compound **3** in  $\text{D}_2\text{O}$  ( $\delta$  37.79 (s) ppm) overtime.

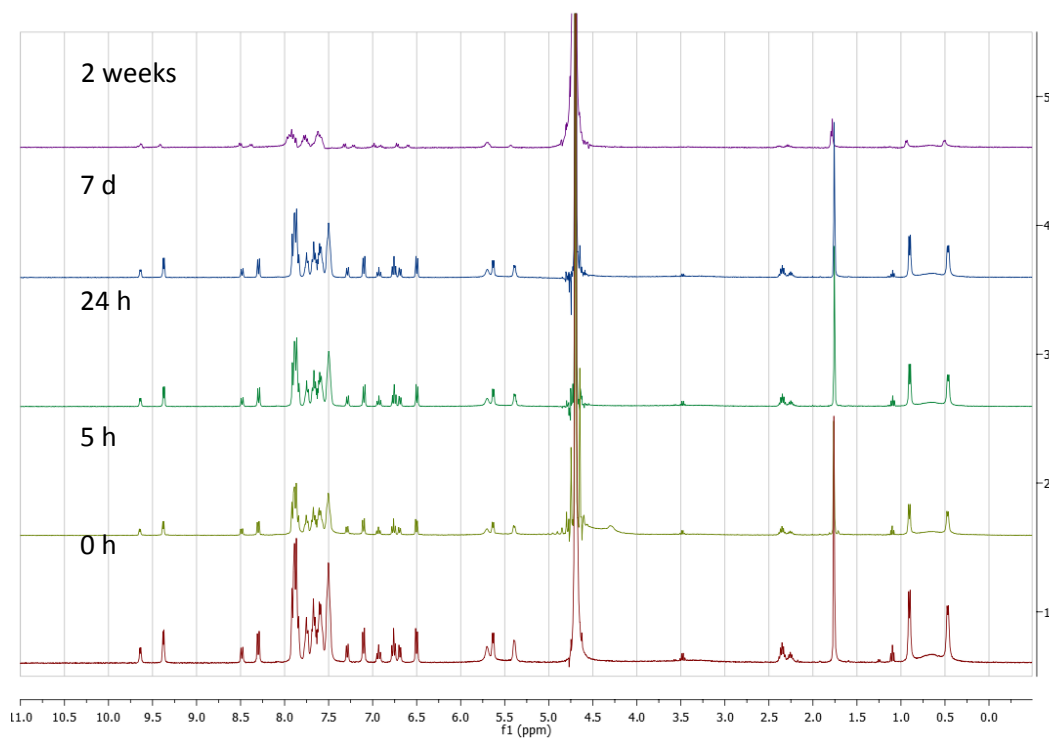

**Figure S20.**  $^1\text{H}$  NMR spectra of compound **3** in  $\text{D}_2\text{O}$  overtime.

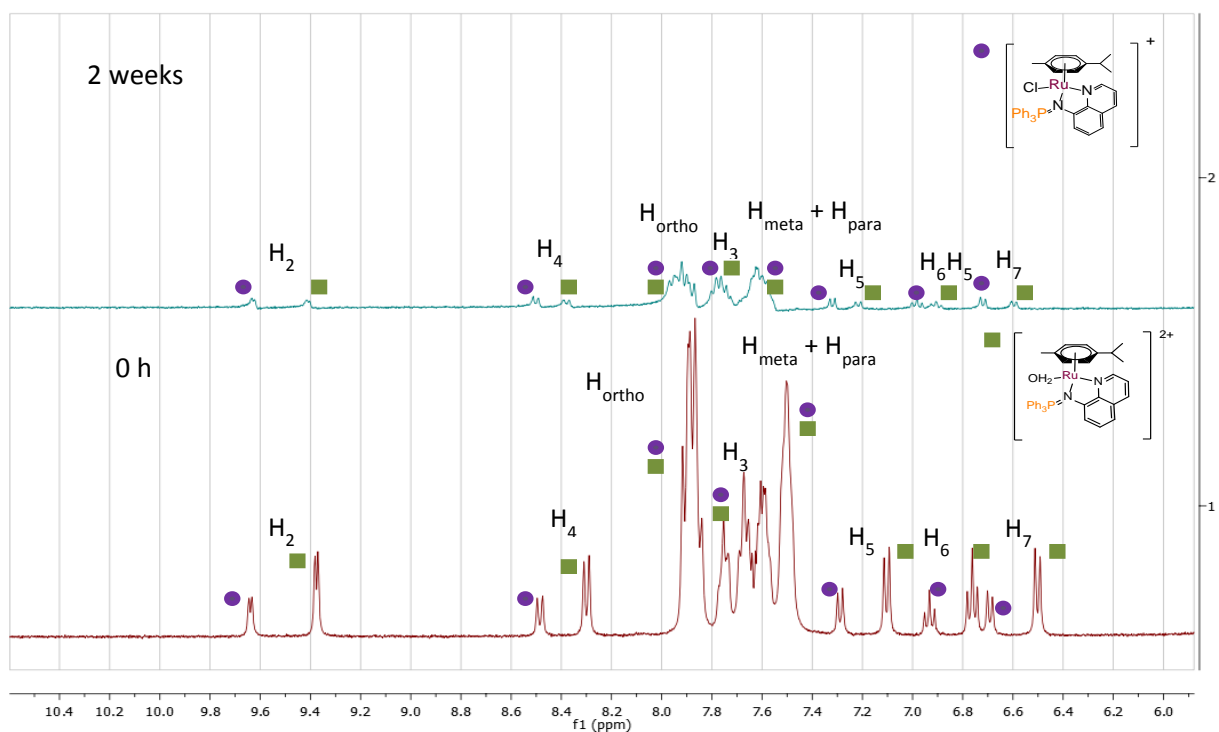

**Figure S21.**  $^1\text{H}$  NMR spectra of compound **3** in  $\text{D}_2\text{O}$  overtime.

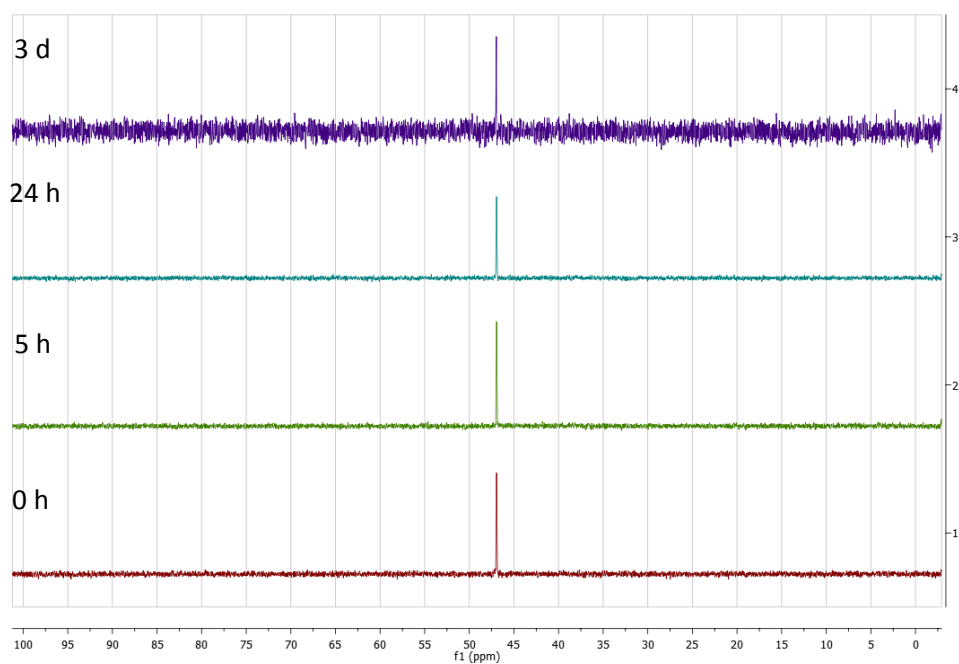

**Figure S22.**  $^{31}\text{P}\{^1\text{H}\}$  NMR spectra of compound **4** in  $\text{D}_2\text{O}$  ( $\delta$  46.95 (s) ppm) overtime.

6.  $^{31}\text{P}\{^1\text{H}\}$  NMR spectra of compounds **2** in a 100 mM NaCl/D<sub>2</sub>O solution overtime

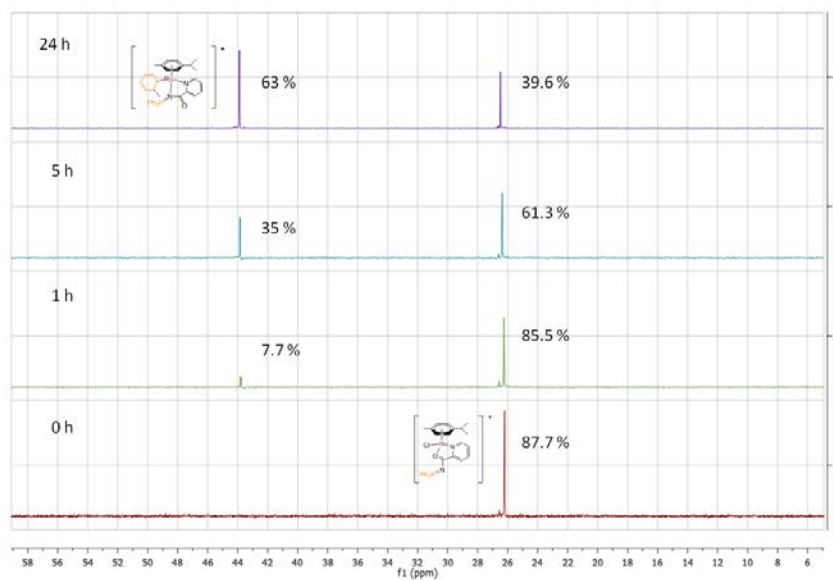

**Figure S23.**  $^{31}\text{P}\{^1\text{H}\}$  NMR spectra of compound **2** in 100mM NaCl/D<sub>2</sub>O ( $\delta$  26.21 (s) ppm) overtime.

7.  $^{31}\text{P}\{^1\text{H}\}$  and  $^1\text{H}$  NMR spectra of compounds **2** and **3** in a  $\text{D}_2\text{O}$  solution at  $80^\circ\text{C}$  during 1 h

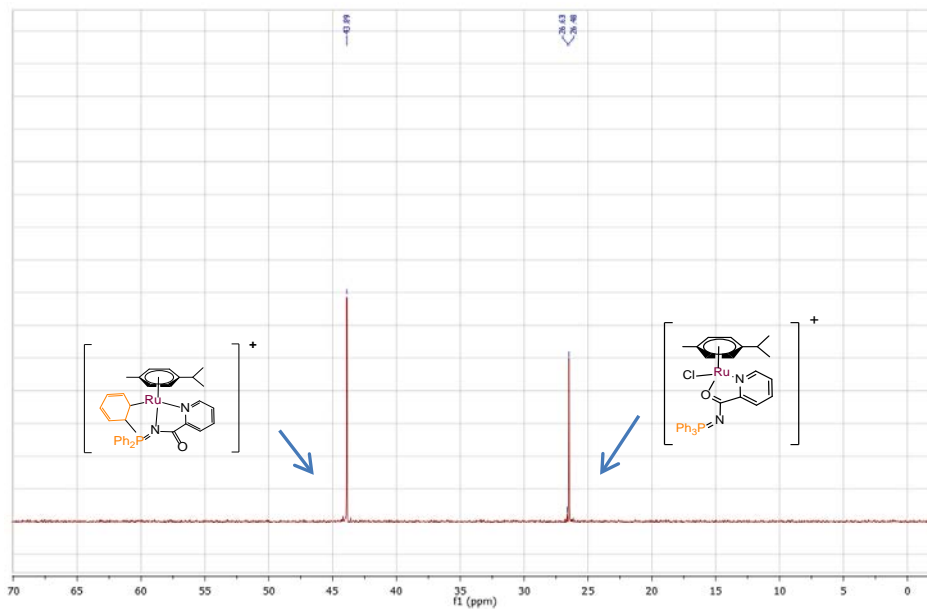

**Figure S24.**  $^{31}\text{P}\{^1\text{H}\}$  NMR spectra of compound **2** in  $\text{D}_2\text{O}$  ( $\delta$  26.48 (s) ppm) after heating at  $80^\circ\text{C}$  for one hour.

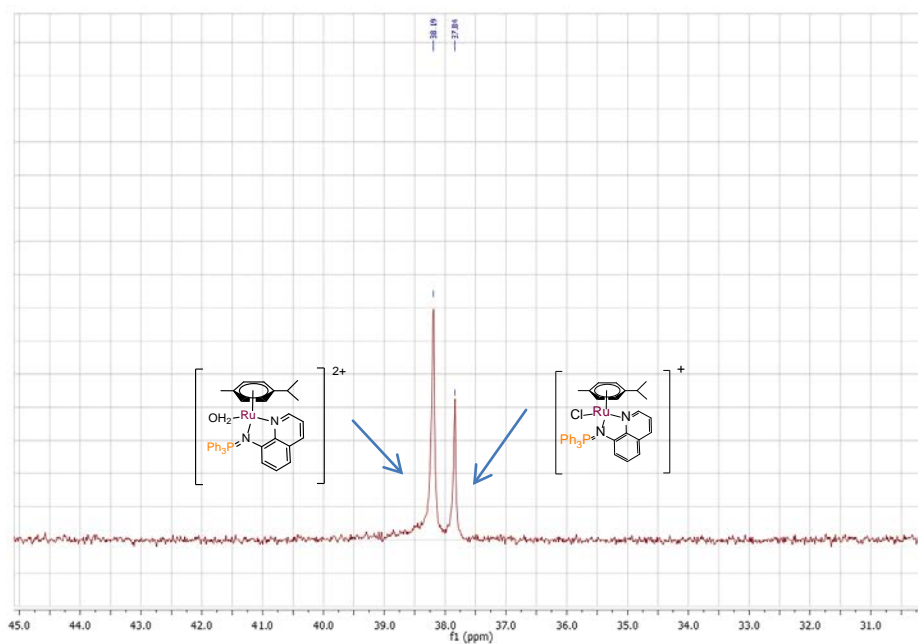

**Figure S25.**  $^{31}\text{P}\{^1\text{H}\}$  NMR spectra of compound **3** in  $\text{D}_2\text{O}$  ( $\delta$  37.84 (s) ppm) after heating at  $80^\circ\text{C}$  for one hour.



## 8. Mass spectra (ESI+) of compound 2 in H<sub>2</sub>O solution overtime (5 days)

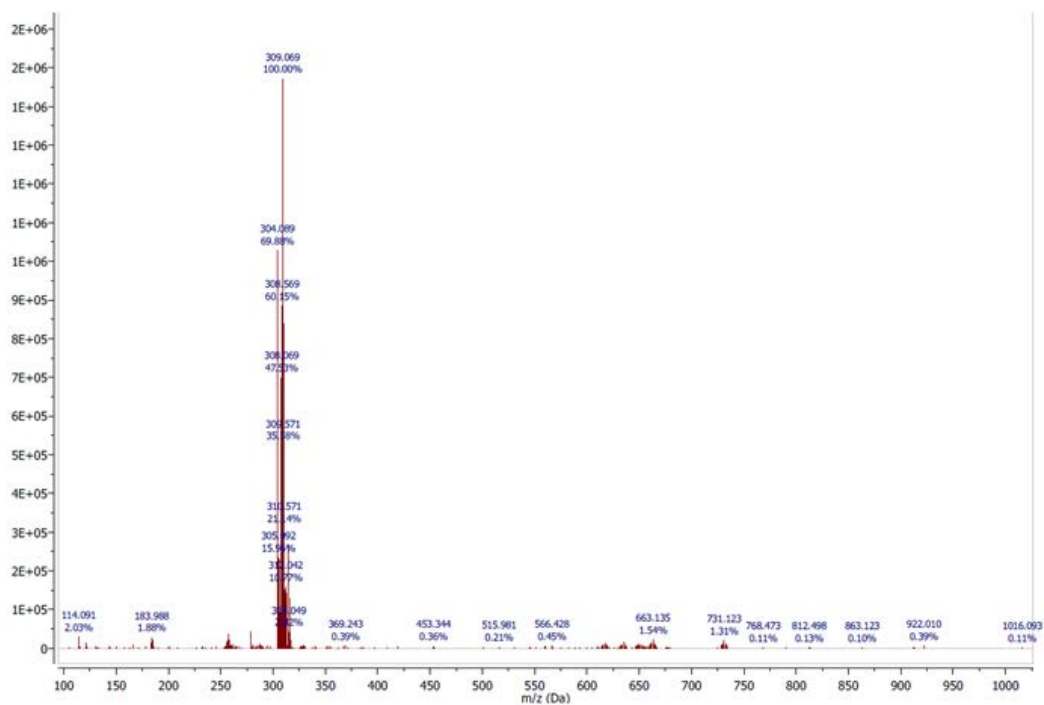

Figure S26. MS ESI+ of compound 2 in H<sub>2</sub>O solution at t=0.

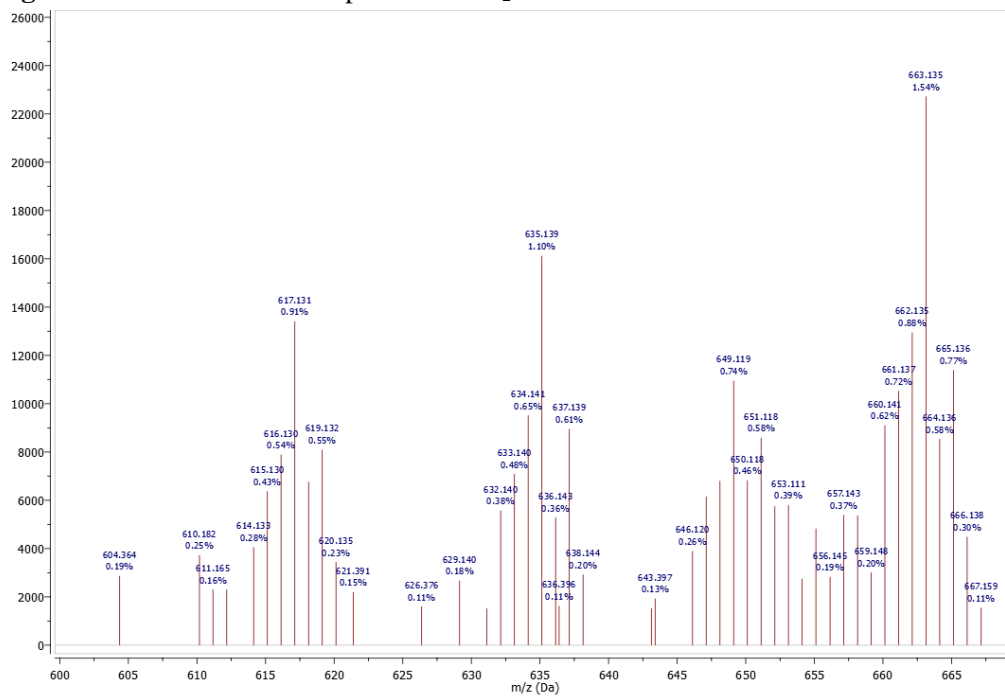

Figure S27. Magnification of [m/z]: 617.1 from 600 to 665 of compound 2 in H<sub>2</sub>O solution at t=0.

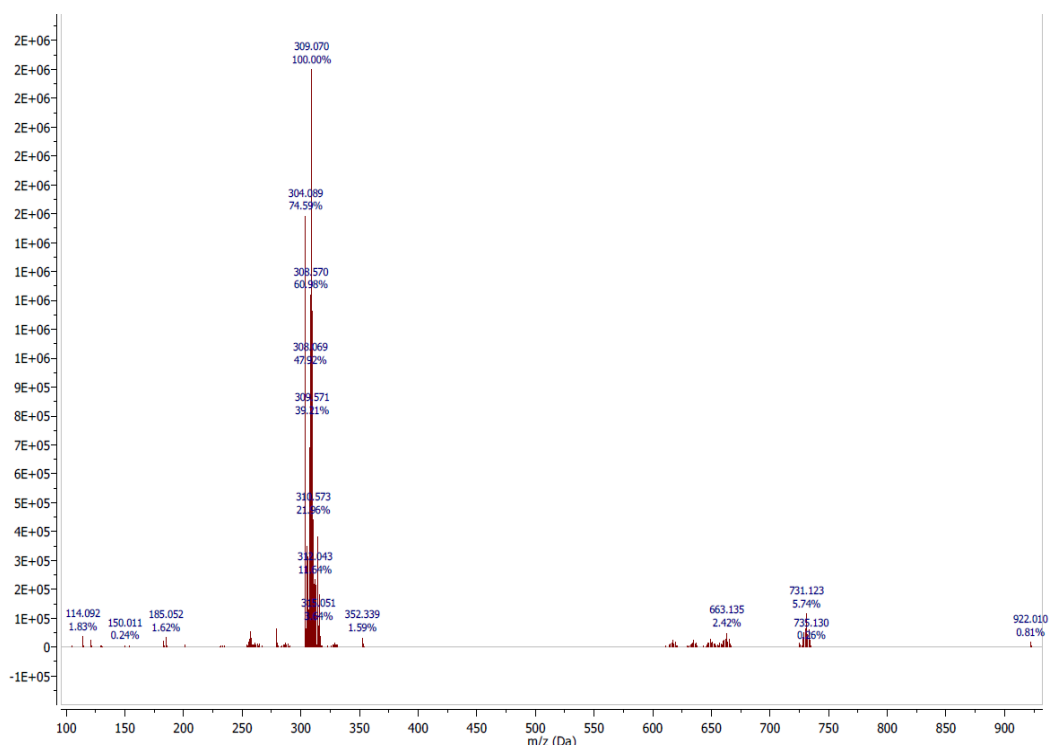

**Figure S28.** MS ESI+ of compound **2** in H<sub>2</sub>O solution at t= 5 days.

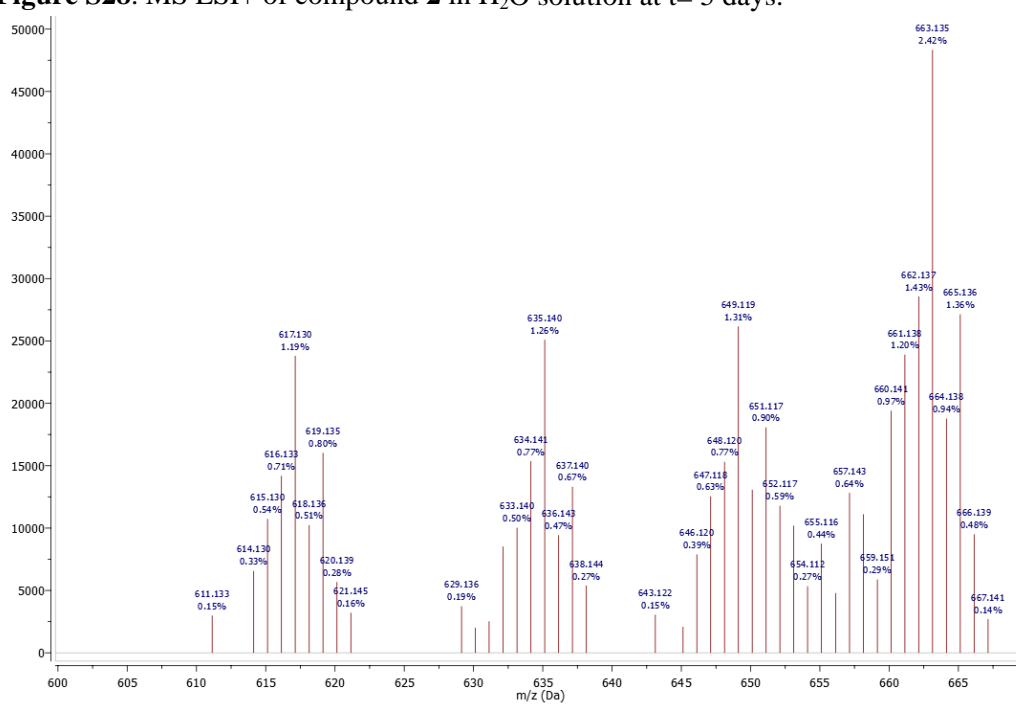

**Figure S29.** Magnification of [m/z]: 617.1 from 600 to 665 of compound **2** in H<sub>2</sub>O solution at t=5 days.

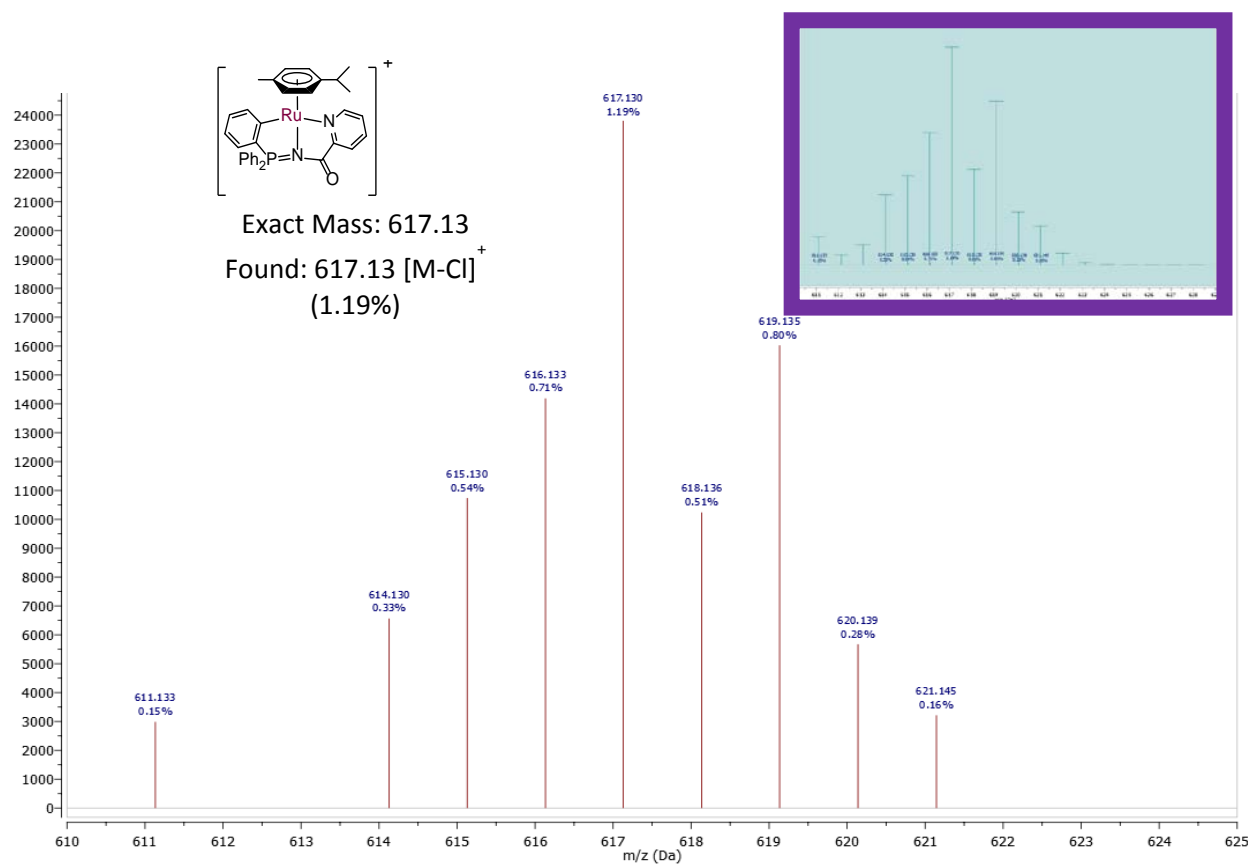

**Figure S30.** Magnification of peak at [m/z]: 617.1 corresponding to species  $[(\eta^6\text{-}p\text{-cymene})\text{Ru}(\text{IM-k-C},\text{N-C}_6\text{H}_4(\text{PPh}_2=\text{N-CO-2-N-C}_5\text{H}_4))]^+$  in the MS ESI<sup>+</sup> spectrum of compound **2** in H<sub>2</sub>O solution at t= 5 months. Insert: theoretical isotopic distribution.

## 9. Study of the effect of 2 in the levels of proteins of the Bcl-2 family

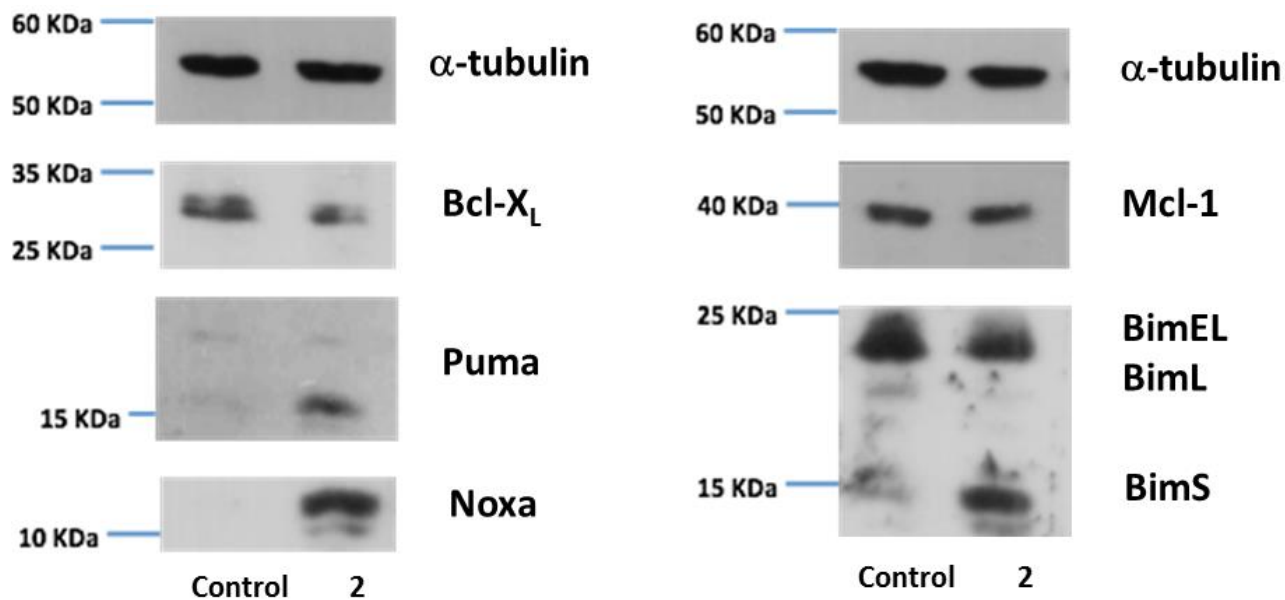

**S31.** Effect of **2** in the levels of proteins of the Bcl-2 family. Jurkat cells were left untreated (control) or incubated for 6 h with compound **2** (1  $\mu$ M). At the end of incubations total protein extracts were prepared as described in the Experimental section and analyzed by Western Blot with specific antibodies as indicated. Blots are representative of three independent experiments.

## 10. Experiments to assess the interaction of compounds 2-4 with CT DNA by circular dichroism

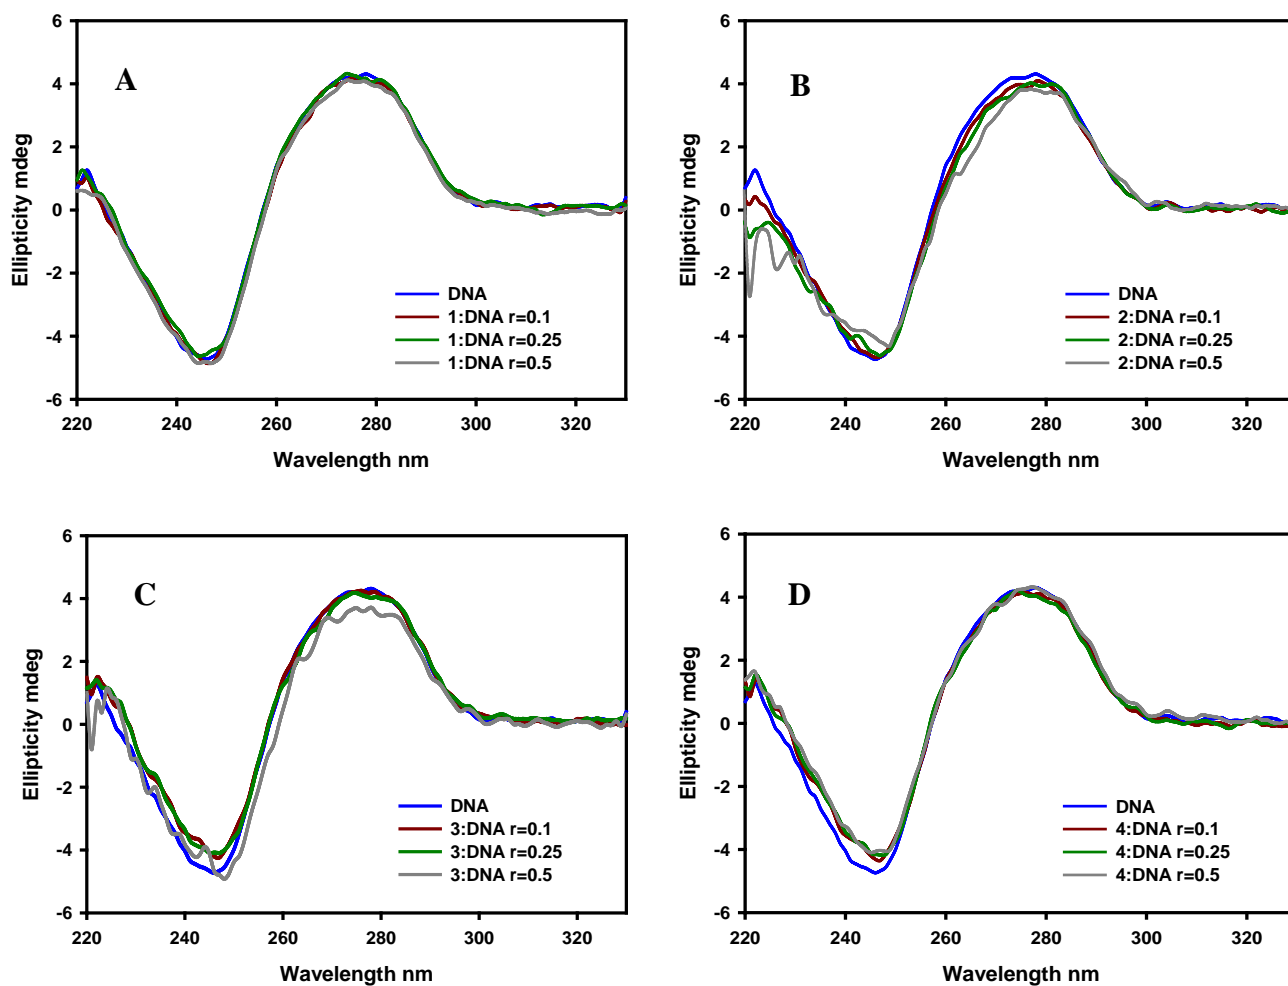

**Figure S32.** CD spectra of CT DNA (48 μM) and CT DNA incubated with 0.1, 0.25 and 0.5 equivalents of compounds **1** (A), **2** (B), **3** (C) and **4** (D) for 20 h at 37 °C.
